# Supplementary material for: Reactivity of a half-lantern Pt2(ii,ii) complex with triphenylphosphine: selectivity in a protonation reaction
Source: Royal Society of Chemistry journal article supplement (doi:10.1039/c6ra15604e), 2016-01-01
Supplement: c6ra15604e1.pdf [file c6ra15604e1.pdf]

## Electronic Supplementary Information

### **Reactivity of a half-lantern Pt<sub>2</sub>(II,II) complex with triphenylphosphine: Selectivity in protonation reaction**

*Maryam Niazi,<sup>a</sup> Hamid R. Shamsavari,<sup>a\*</sup> Mohsen Golbon Haghighi,<sup>b</sup> Mohammad Reza Halvagar,<sup>c</sup> Samaneh Hatami<sup>a</sup> and Behrouz Notash<sup>b</sup>*

<sup>a</sup>Department of Chemistry, Institute for Advanced Studies in Basic Sciences (IASBS), Yousef Sobouti Blvd., Zanzan 45137-6731, Iran.

<sup>b</sup>Department of Chemistry, Shahid Beheshti University, Evin, Tehran 1983963113, Iran

<sup>c</sup>Chemistry & Chemical Engineering Research Center of Iran, Tehran, 14968-13151, Iran

Email: [shamsavari@iasbs.ac.ir](mailto:shamsavari@iasbs.ac.ir)

| <b>Contents:</b>                                                                                                                                                                                                                                                                                                                                          | <b>Page</b> |
|-----------------------------------------------------------------------------------------------------------------------------------------------------------------------------------------------------------------------------------------------------------------------------------------------------------------------------------------------------------|-------------|
| <b>Table S1.</b> Composition (%) of frontier MOs for complex <b>2</b> in acetone solution.                                                                                                                                                                                                                                                                | 3           |
| <b>Table S2.</b> TD-DFT computed and experimental wavelengths (nm) for the lower energy band in complex <b>2</b> in acetone solution.                                                                                                                                                                                                                     | 3           |
| <b>Figure S1.</b> $^1\text{H}$ NMR spectra of complex (a) <b>1a</b> and (b) reaction mixture of complex <b>1a</b> with $\text{PPh}_3$ in $\text{CD}_2\text{Cl}_2$ at room temperature.                                                                                                                                                                    | 4           |
| <b>Figure S2.</b> $^{31}\text{P}$ $\{^1\text{H}\}$ NMR spectra of reaction mixture of complex <b>1a</b> with $\text{PPh}_3$ in $\text{CD}_2\text{Cl}_2$ at room temperature and formed triphenylphosphine oxide.                                                                                                                                          | 5           |
| <b>Figure S3.</b> Change in the absorbance spectra of complex $[\{\text{Pt}(\text{ppy})(\mu_2\text{-Spy})\}_2]$ , <b>1</b> , with an excess of $\text{PPh}_3$ in acetone at $T = 25\text{ }^\circ\text{C}$ as function of wavelength; successive spectra recorded at intervals of 3 min.                                                                  | 6           |
| <b>Figure S4.</b> Representative frontier orbitals involved in the absorption of complex <b>2</b> .                                                                                                                                                                                                                                                       | 7           |
| <b>Figure S5.</b> ESI-Mass spectrum of complex <b>2</b> in cationic mode.                                                                                                                                                                                                                                                                                 | 8           |
| <b>Figure S6.</b> ESI-Mass spectrum of complex <b>2</b> , peak corresponding to $[\text{Pt}(\text{ppy})(\eta^1\text{-Spy})(\text{PPh}_3)]^+$ , $[\mathbf{2}]^+$ (experimental, black; simulated, blue).                                                                                                                                                   | 9           |
| <b>Figure S7.</b> $^{31}\text{P}$ $\{^1\text{H}\}$ NMR spectrum of complex <b>2</b> in $\text{CD}_2\text{Cl}_2$ at room temperature.                                                                                                                                                                                                                      | 10          |
| <b>Figure S8.</b> Complex <b>2</b> as monitored by $^{31}\text{P}$ $\{^1\text{H}\}$ NMR spectroscopy in $\text{dms}\text{-}d_6$ at room temperature. (a) complex <b>2</b> , (b) after 6h in the dry and deoxygenated solvent; (c) 6 h (d) 12 h, (e) 24 h and (f) 48 h in the hydrated (hydrous and aerated) solvent. The signal assignments are depicted. | 11          |
| <b>Figure S9.</b> Complex <b>2</b> as monitored by $^1\text{H}$ NMR spectroscopy in $\text{dms}\text{-}d_6$ at room temperature. (a) complex <b>2</b> , (b) 6 h, (c) 12 h, (d) 24 h, (e) 48 h, (f) 72 h in the hydrous and aerated solvent and (g) complex <b>1</b> .                                                                                     | 12          |
| <b>Figure S10.</b> Photograph of transformation of complex <b>2</b> to complex <b>1</b> .                                                                                                                                                                                                                                                                 | 13          |
| <b>Figure S11.</b> $^{31}\text{P}$ $\{^1\text{H}\}$ NMR spectra of (a) complex <b>2</b> and (b) complex <b>5</b> in acetone- $d_6$ at room temperature.                                                                                                                                                                                                   | 14          |
| <b>Figure S12.</b> $^1\text{H}$ NMR spectra of (a) complex <b>2</b> and (b) complex <b>5</b> in acetone- $d_6$ at room temperature.                                                                                                                                                                                                                       | 15          |
| <b>Figure S13.</b> $^1\text{H}$ NMR spectra of (a) complex <b>5</b> (b) complex <b>5</b> + $\text{D}_2\text{O}$ in acetone- $d_6$ at room temperature.                                                                                                                                                                                                    | 16          |
| <b>Table S3.</b> Crystallographic and structure refinement data for complex <b>4</b> .                                                                                                                                                                                                                                                                    | 17          |
| <b>Figure S14.</b> $\text{C-H}\cdots\pi$ interaction between $\text{C-H}$ group adjacent to metalated carbon atom of the ppy ligand and the phenyl ring of $\text{PPh}_3$ ligand in complex <b>4</b> (green lines).                                                                                                                                       | 18          |
| <b>Figure S15.</b> Intramolecular $\pi\cdots\pi$ contact between the SPh and phenyl ring of $\text{PPh}_3$ in complex <b>4</b> .                                                                                                                                                                                                                          | 18          |

**Table S1.** Composition (%) of frontier MOs for complex **2** in acetone solution.

| MO     | Energies(ev) | Pt | Spy | ppy | PPh <sub>3</sub> |
|--------|--------------|----|-----|-----|------------------|
| LUMO+4 | -0.73        | 1  | 2   | 2   | 95               |
| LUMO+3 | -0.95        | 9  | 5   | 20  | 66               |
| LUMO+2 | -1.01        | 5  | 2   | 71  | 22               |
| LUMO+1 | -1.06        | 25 | 3   | 11  | 61               |
| LUMO   | -1.72        | 6  | 2   | 86  | 6                |
| HOMO   | -5.22        | 12 | 80  | 6   | 2                |
| HOMO-1 | -5.88        | 34 | 24  | 40  | 2                |
| HOMO-2 | -6.17        | 68 | 11  | 14  | 7                |
| HOMO-3 | -6.35        | 15 | 36  | 46  | 3                |
| HOMO-4 | -6.54        | 8  | 25  | 61  | 6                |

**Table S2.** TD-DFT computed and experimental wavelengths (nm) for the lower energy band in complex **2** in acetone solution.

| $\lambda_{\text{cal}}$<br>(nm) | $f^{\text{a}}$ | $\lambda_{\text{exp}}$<br>(nm) | Transition<br>(Percentage Contribution) | Character                         | Assignment<br>L = ppy, L' = Spy       |
|--------------------------------|----------------|--------------------------------|-----------------------------------------|-----------------------------------|---------------------------------------|
| 433                            | 0.018          | 420                            | HOMO→LUMO (70%)                         | d(Pt)/ $\pi$ (spy)→ $\pi^*$ (ppy) | <sup>1</sup> L'LCT/ <sup>1</sup> MLCT |

<sup>a</sup> Oscillator strength

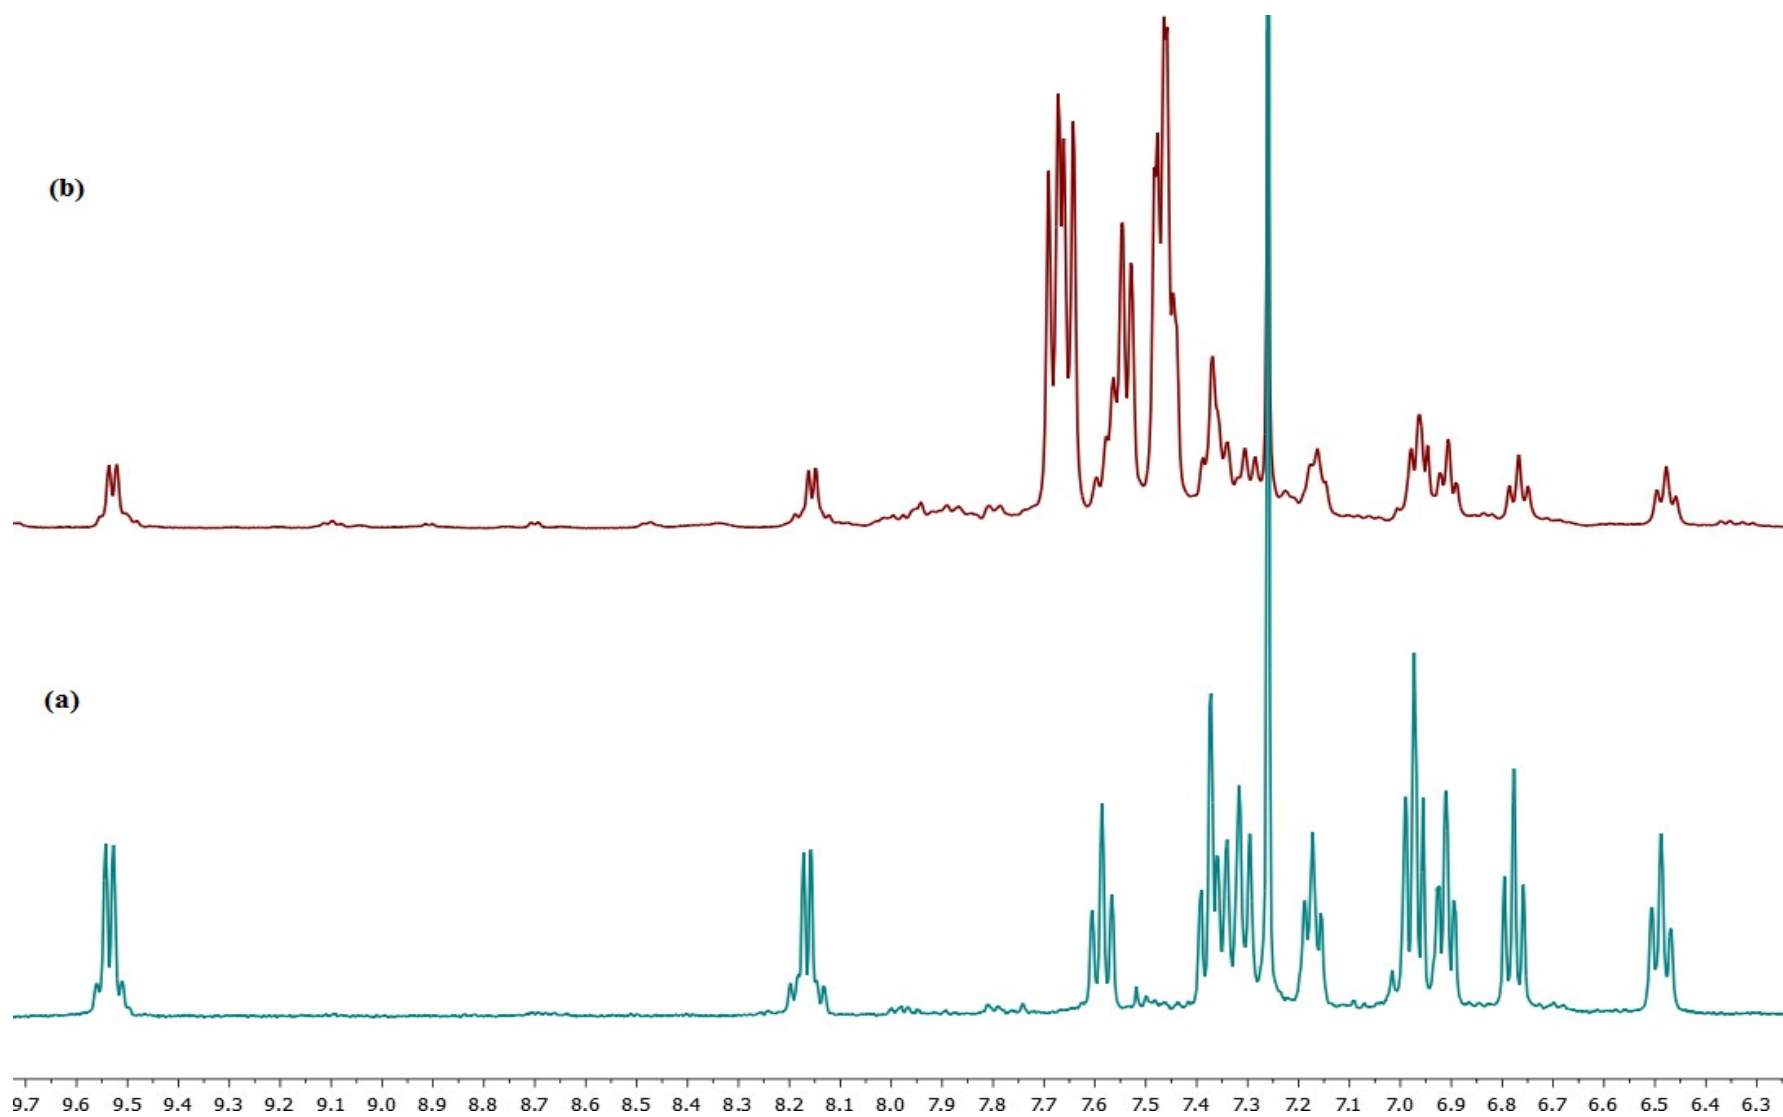

**Figure S1.** <sup>1</sup>H NMR spectra of complex (a) **1a** and (b) reaction mixture of complex **1a** with PPh<sub>3</sub> in CD<sub>2</sub>Cl<sub>2</sub> at room temperature.

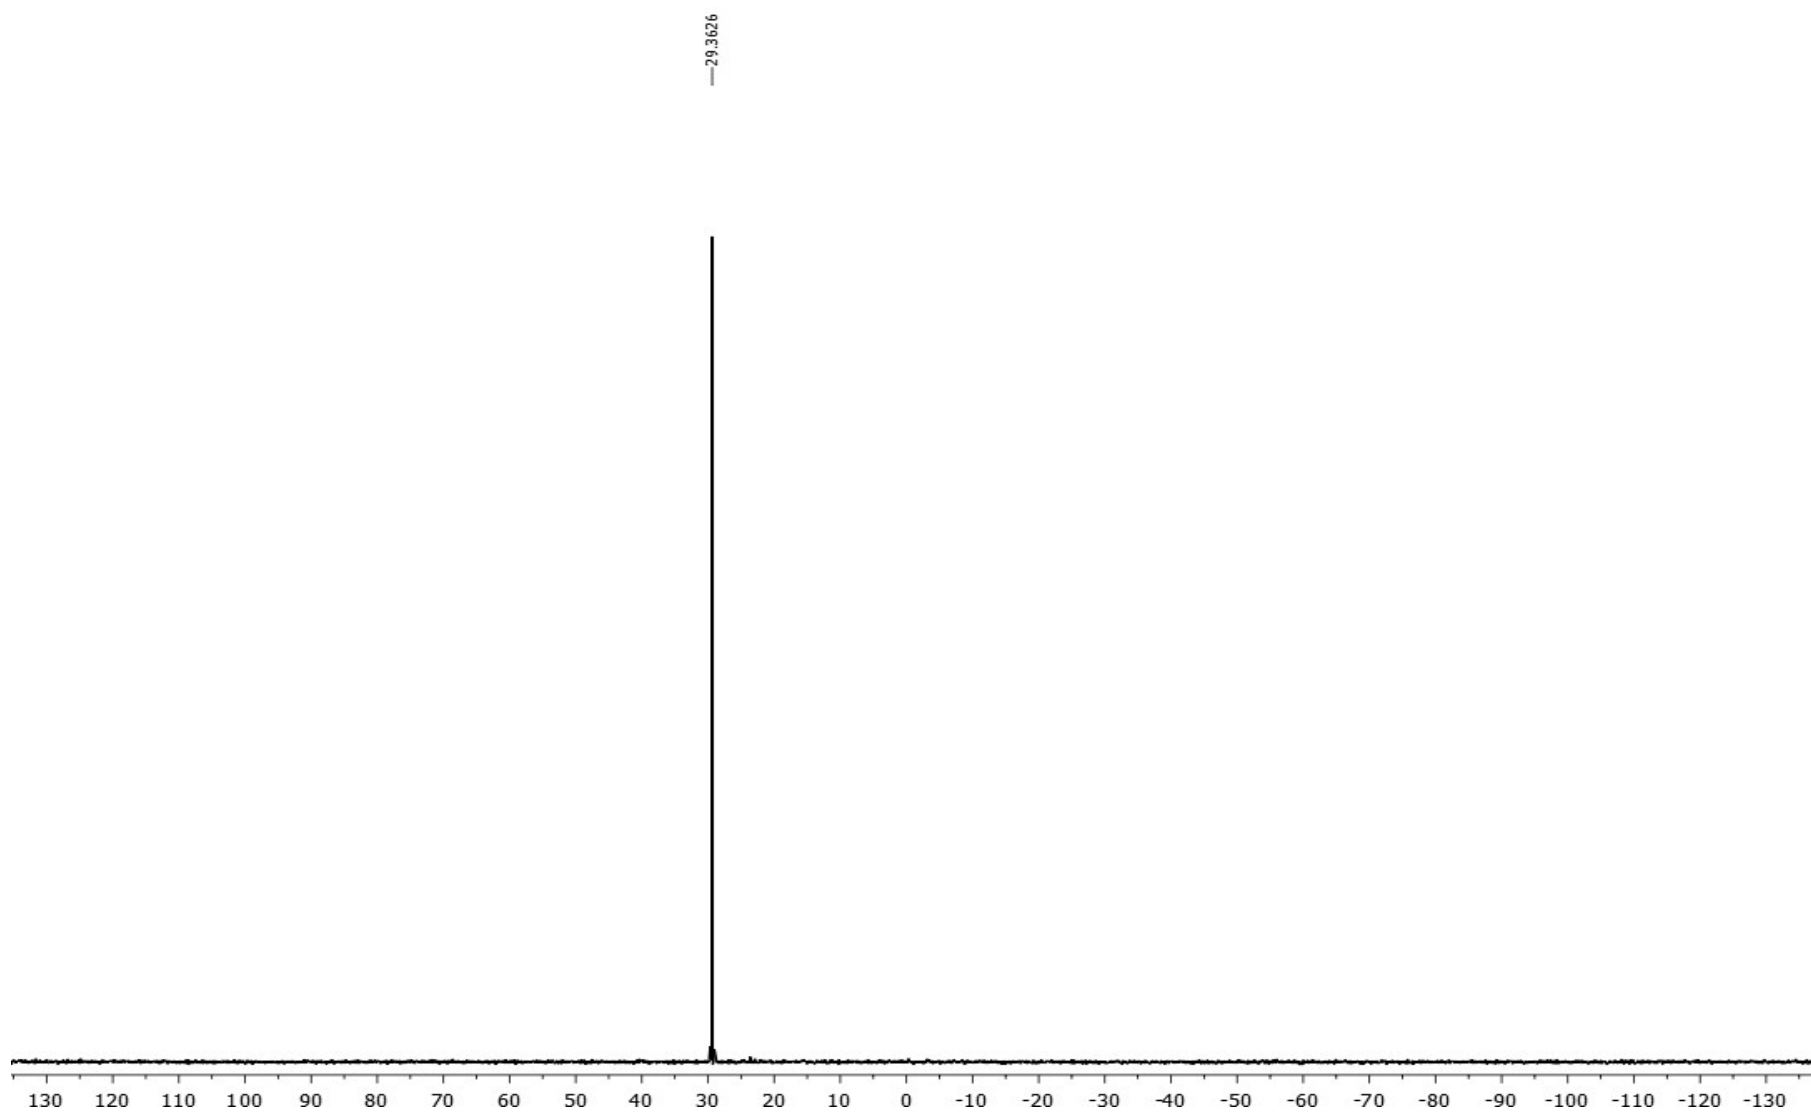

**Figure S2.**  $^{31}\text{P}$   $\{^1\text{H}\}$  NMR spectra of reaction mixture of complex **1a** with  $\text{PPh}_3$  in  $\text{CD}_2\text{Cl}_2$  at room temperature and formed triphenylphosphine oxide.

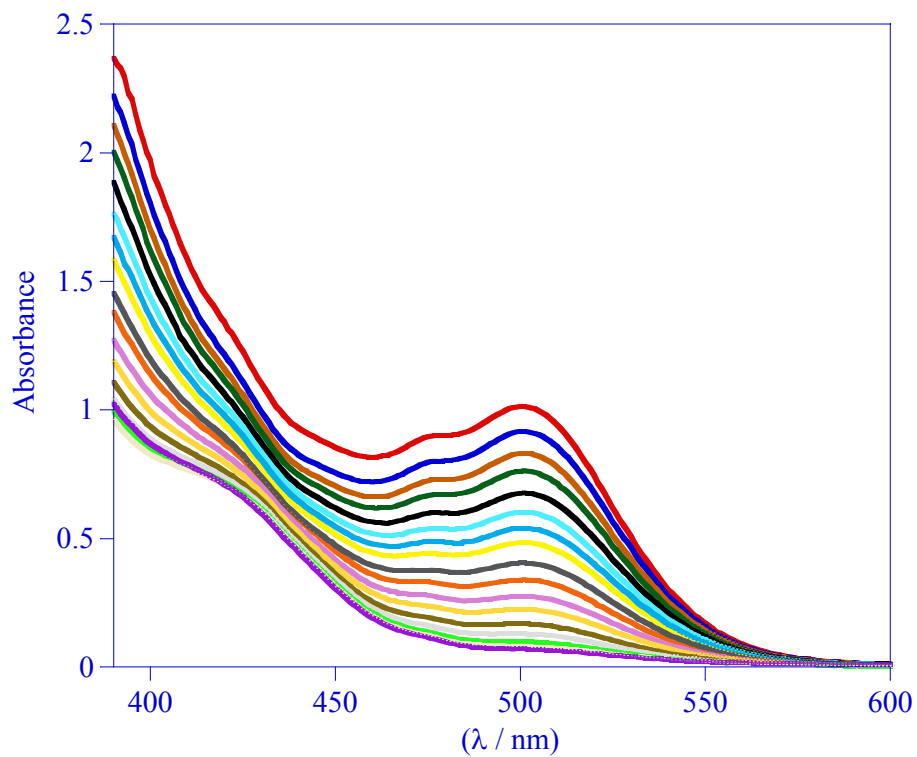

**Figure S3.** Change in the absorbance spectra of complex  $[\{\text{Pt}(\text{ppy})(\mu_2\text{-Spy})\}_2]$ , **1**, with an excess of  $\text{PPh}_3$  in acetone at  $T = 25\text{ }^\circ\text{C}$  as function of wavelength; successive spectra recorded at intervals of 3 min.

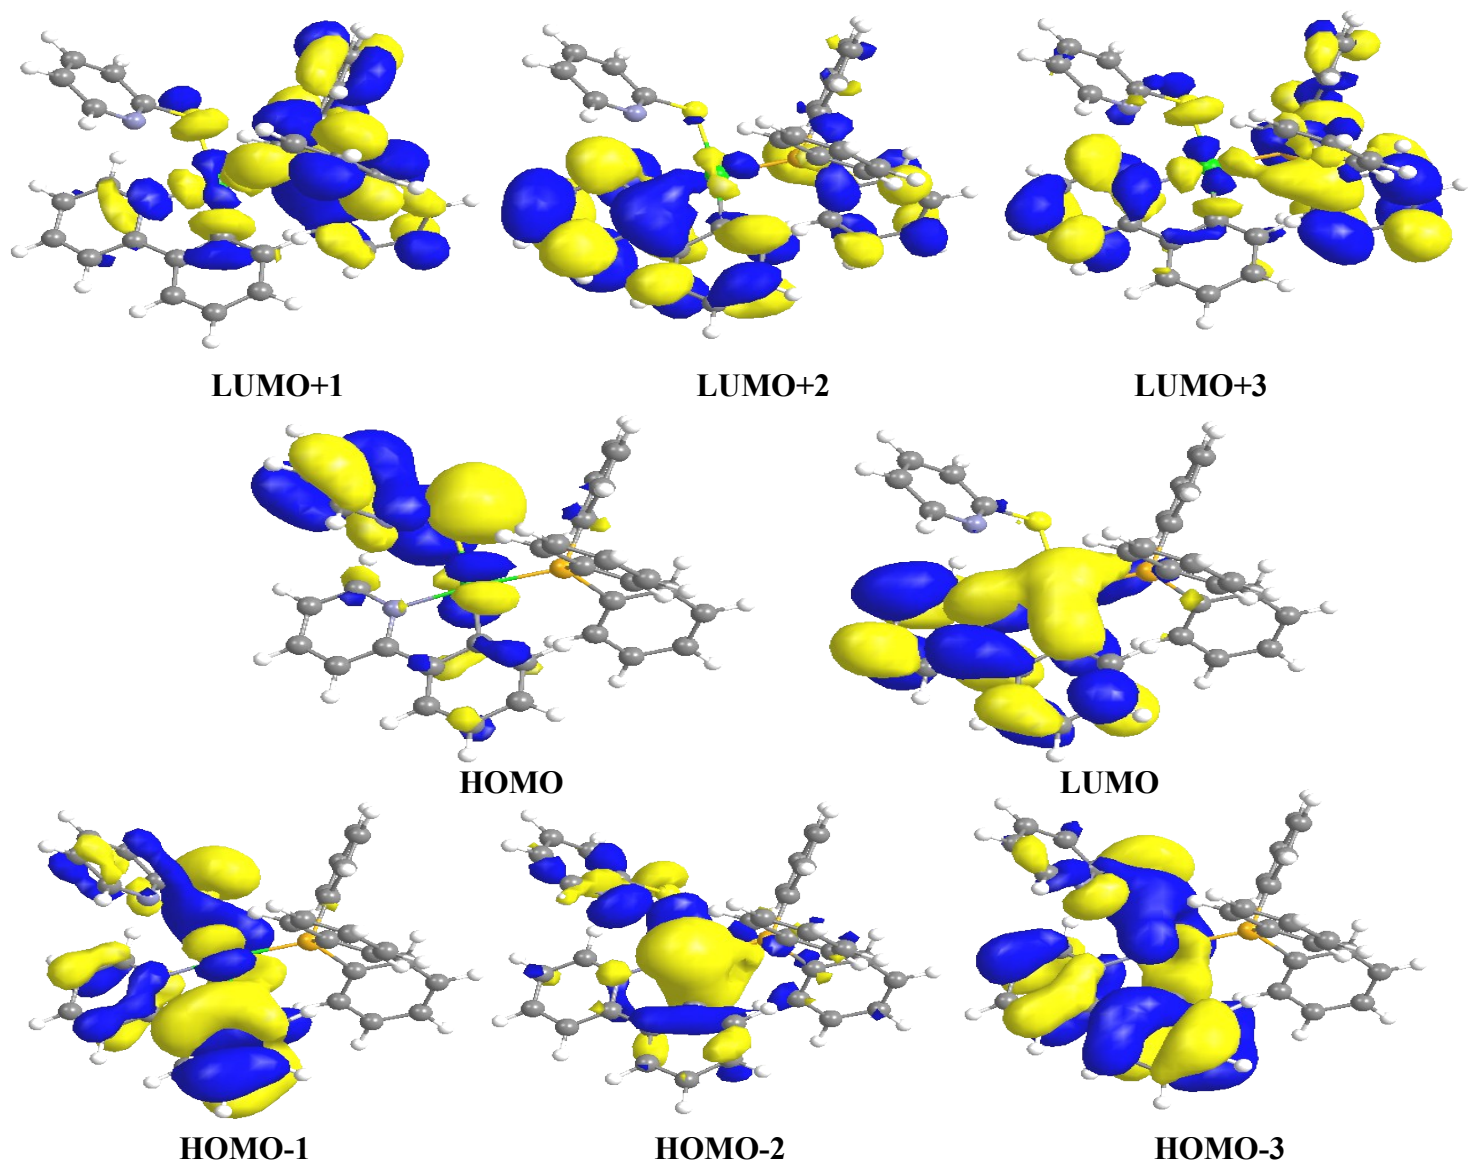

**Figure S4.** Representative frontier orbitals involved in the absorption of complex 2.

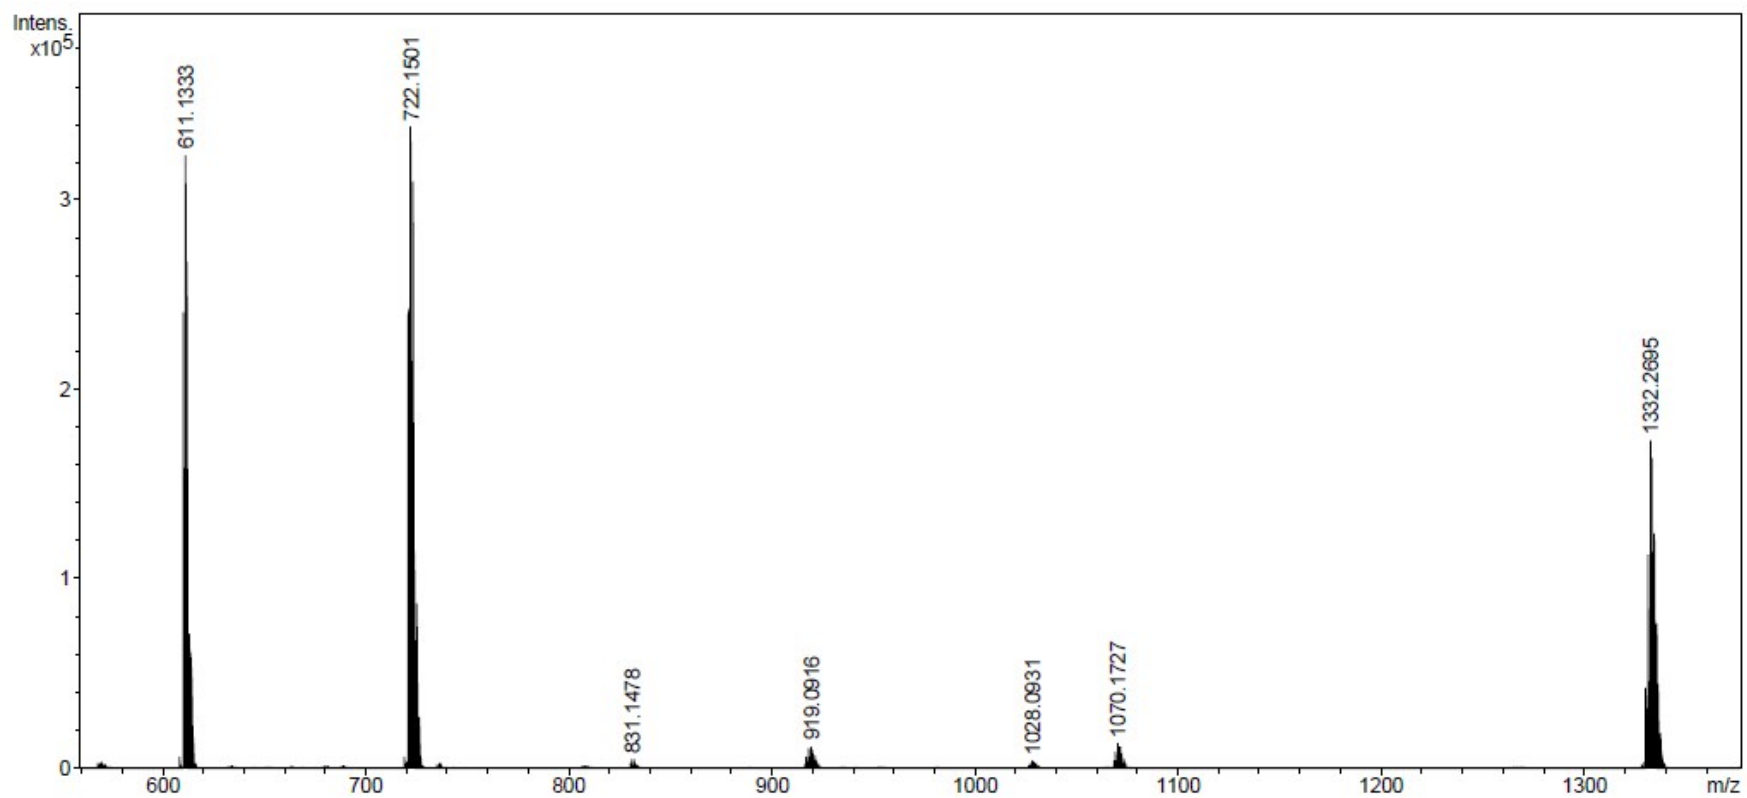

**Figure S5.** ESI-Mass spectrum of complex **2** in cationic mode.



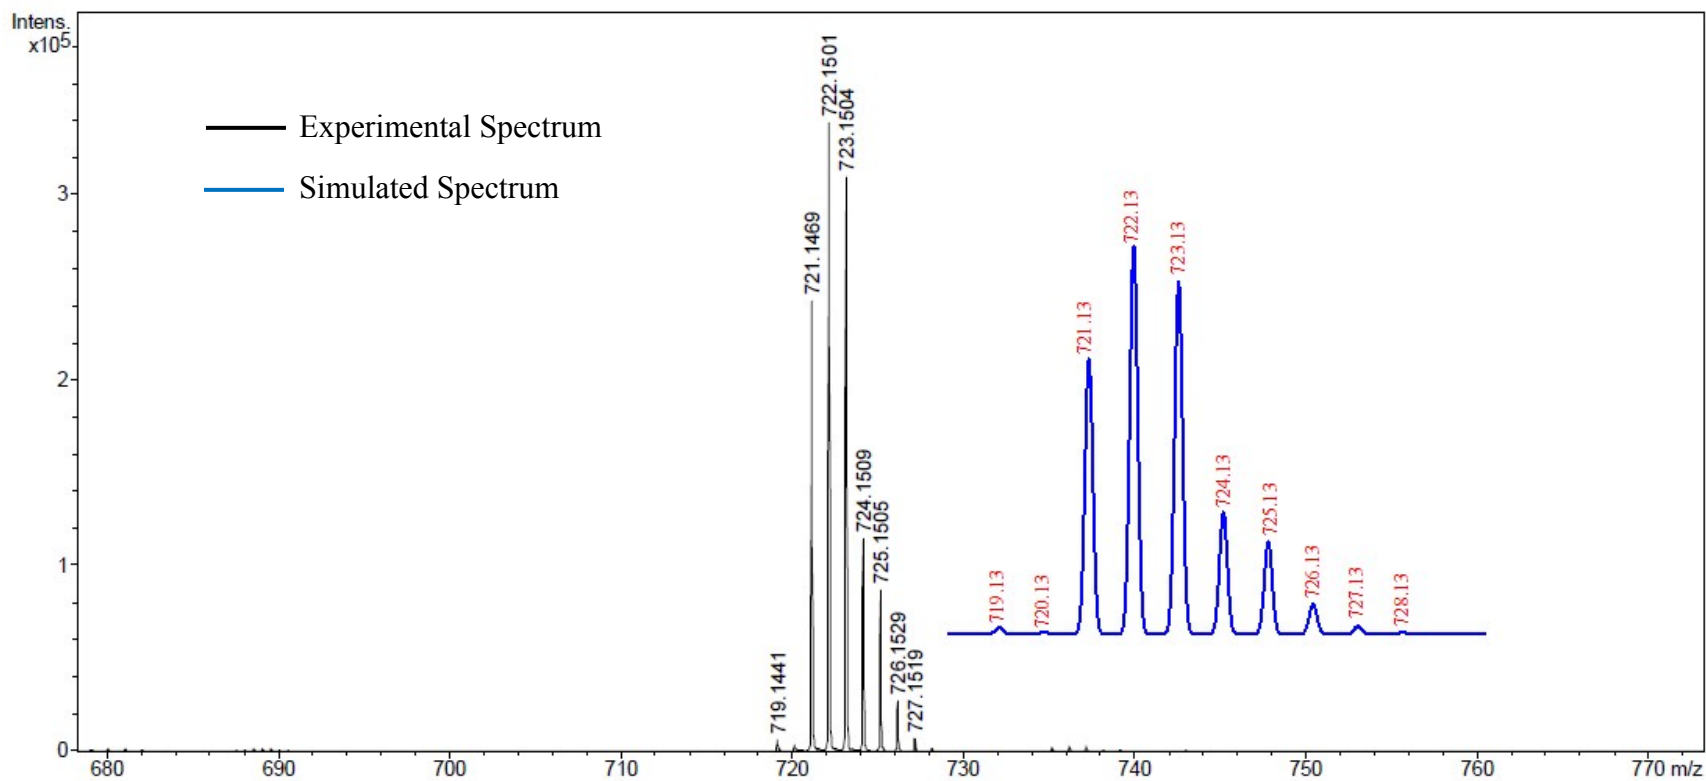

**Figure S6.** ESI-Mass spectrum of complex **2**, peak corresponding to  $[\text{Pt}(\text{ppy})(\eta^1\text{-S-Spy})(\text{PPh}_3)]^+$ ,  $[\mathbf{2}]^+$  (experimental, black; simulated, blue).

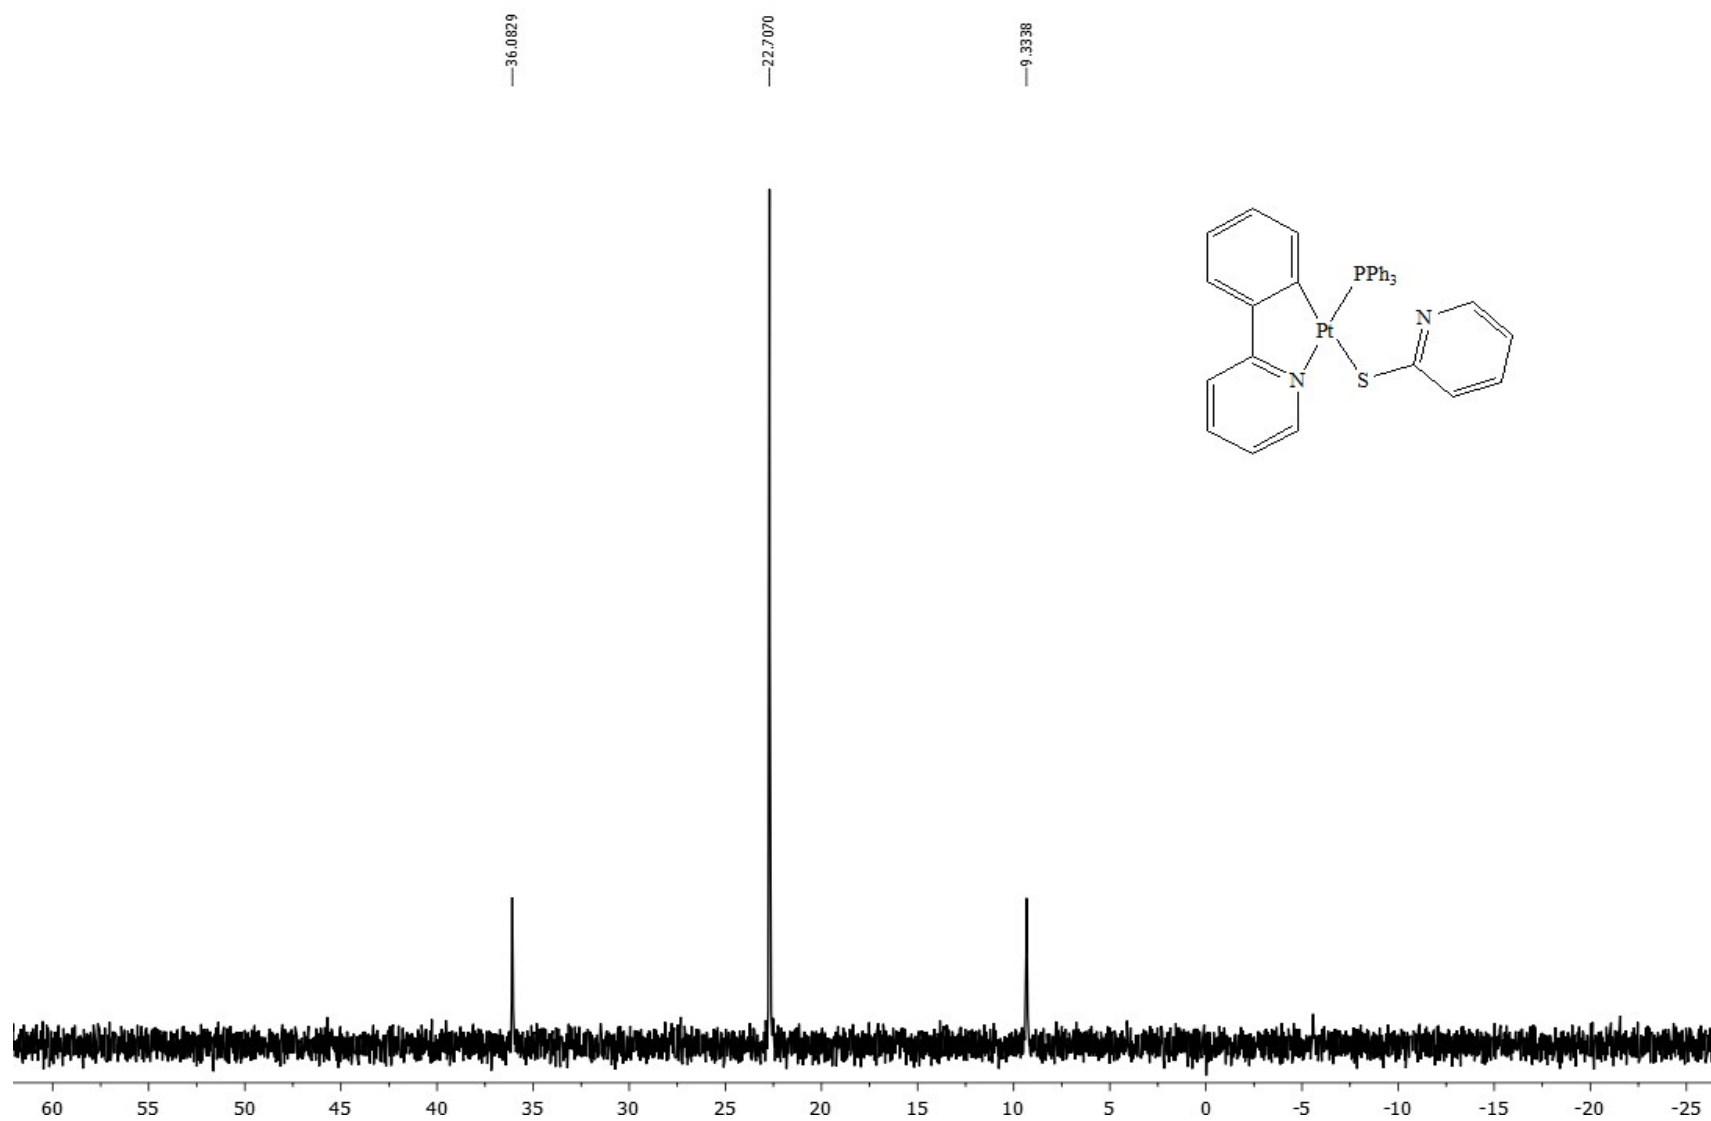

**Figure S7.**  $^{31}\text{P}$   $\{^1\text{H}\}$  NMR spectrum of complex **2** in  $\text{CD}_2\text{Cl}_2$  at room temperature.

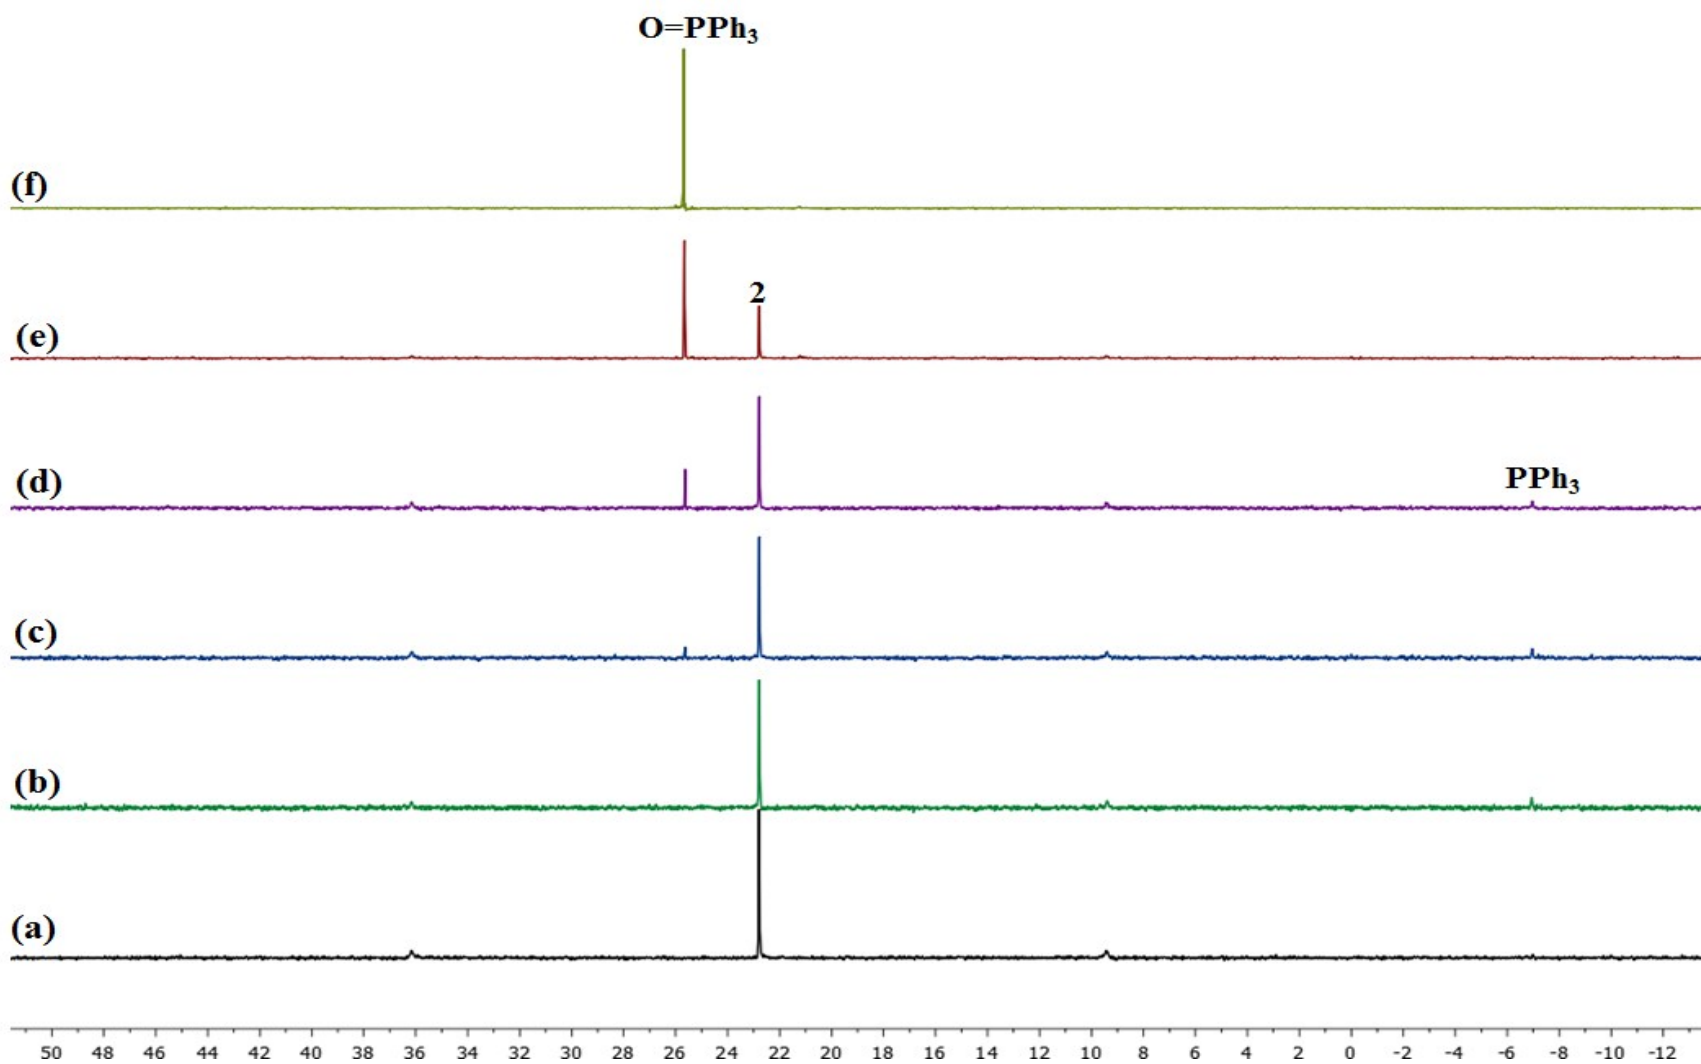

**Figure S8.** Complex **2** as monitored by  $^{31}\text{P}$   $\{^1\text{H}\}$  NMR spectroscopy in  $\text{dmsO-}d_6$  at room temperature. (a) complex **2**, (b) after 6h in the dry and deoxygenated solvent; (c) 6 h (d) 12 h, (e) 24 h and (f) 48 h in the hydrated (hydrous and aerated) solvent. The signal assignments are depicted.

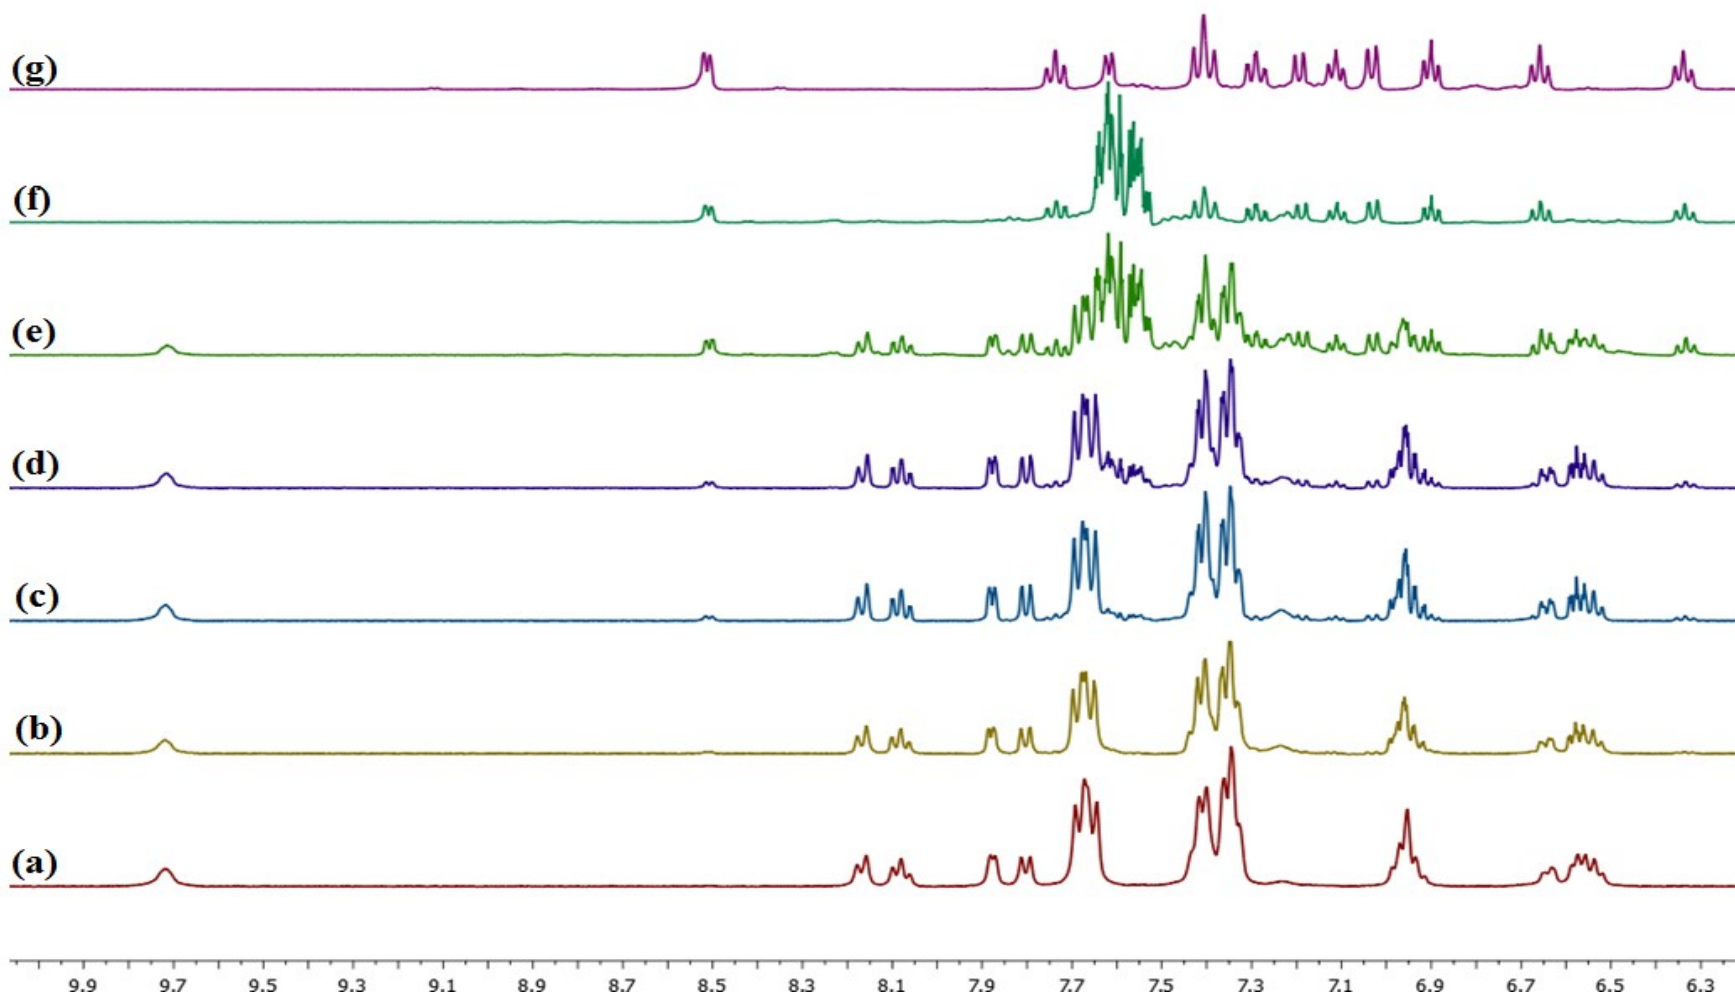

**Figure S9.** Complex **2** as monitored by <sup>1</sup>H NMR spectroscopy in dms0-*d*<sub>6</sub> at room temperature. (a) complex **2**, (b) 6 h, (c) 12 h, (d) 24 h, (e) 48 h, (f) 72 h in the hydrous and aerated solvent and (g) complex **1**.

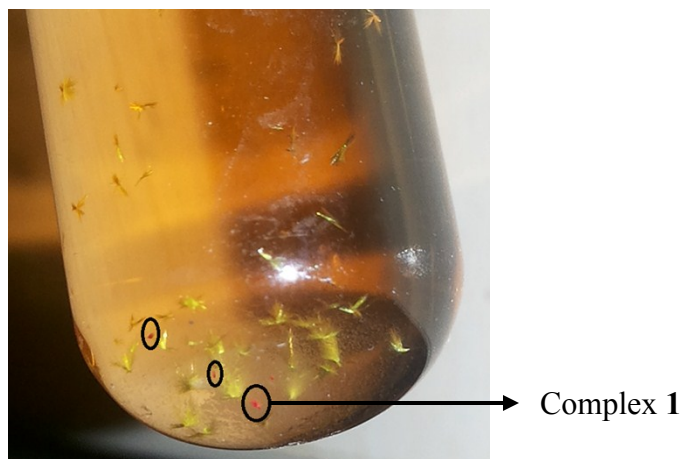

**Figure S10.** Photograph of transformation of complex 2 to complex 1.

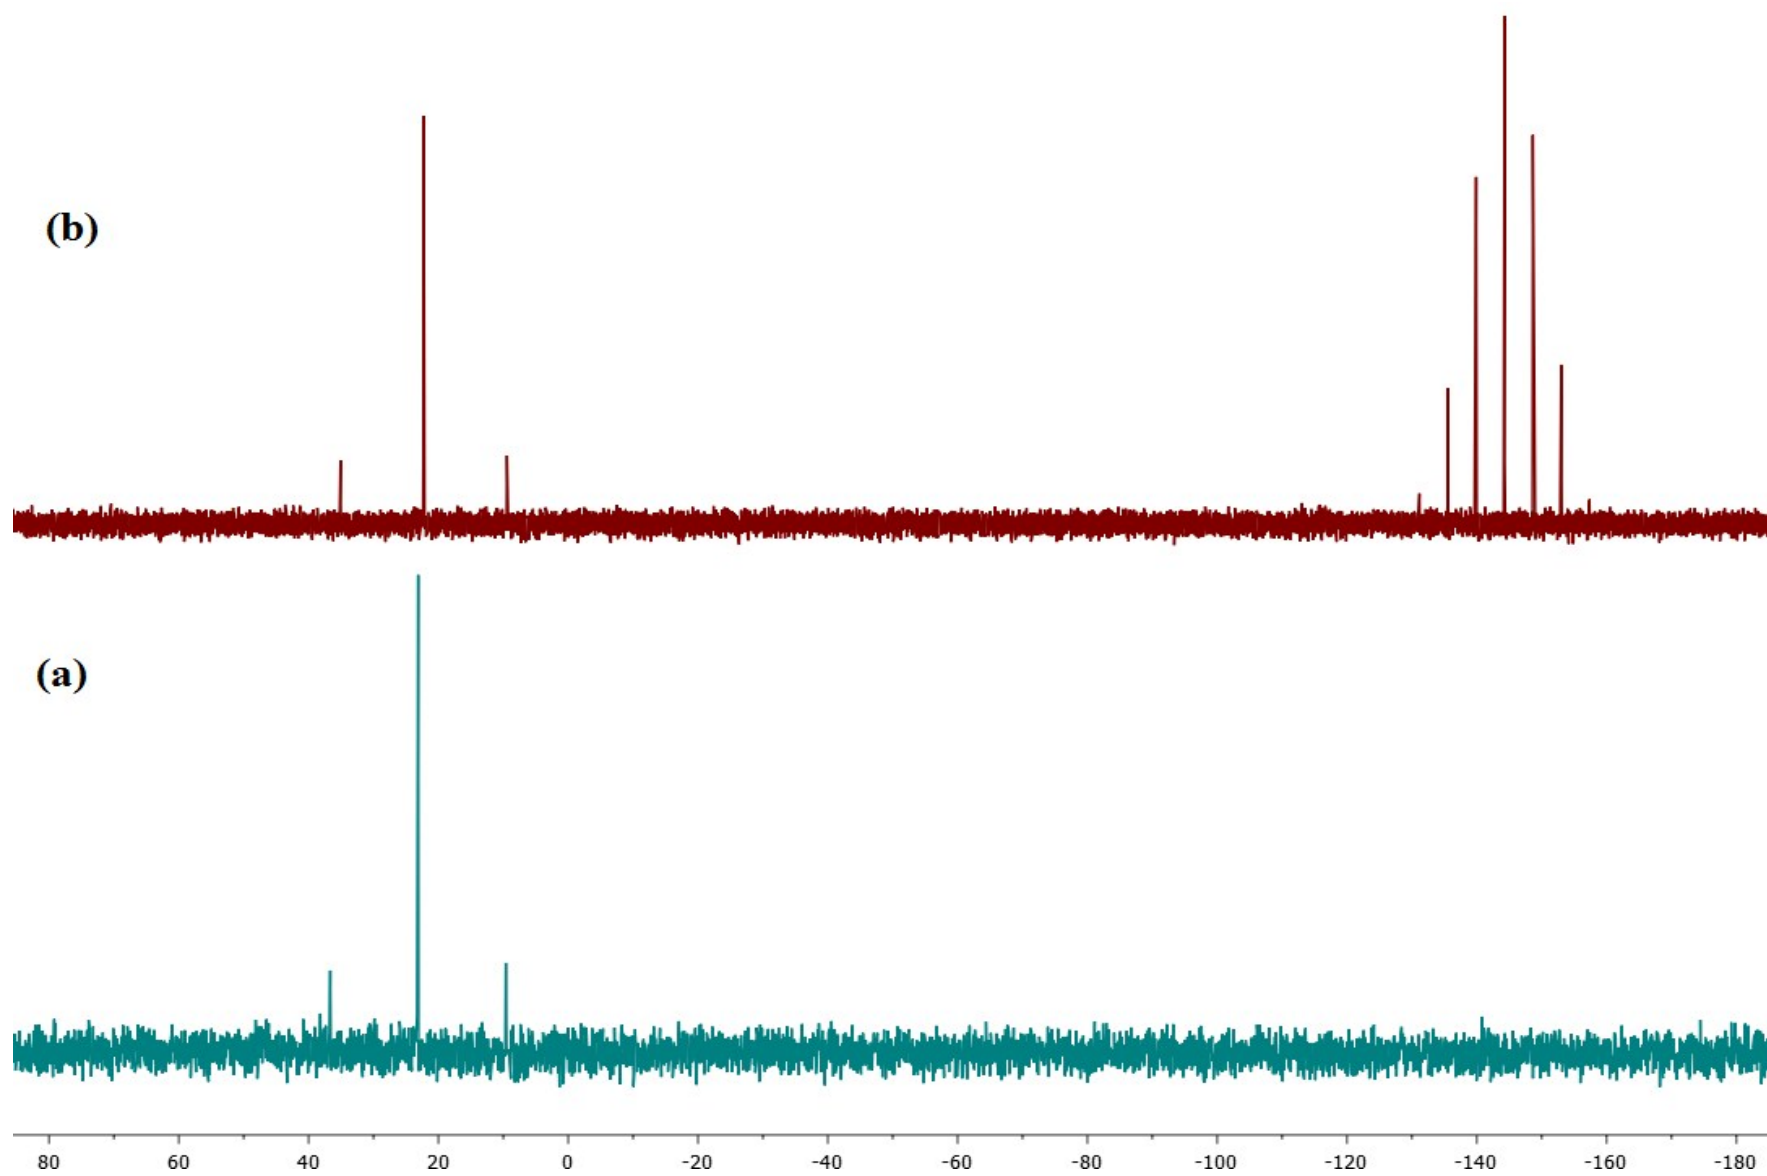

**Figure S11.**  $^{31}\text{P}$   $\{^1\text{H}\}$  NMR spectra of (a) complex **2** and (b) complex **5** in acetone- $d_6$  at room temperature.

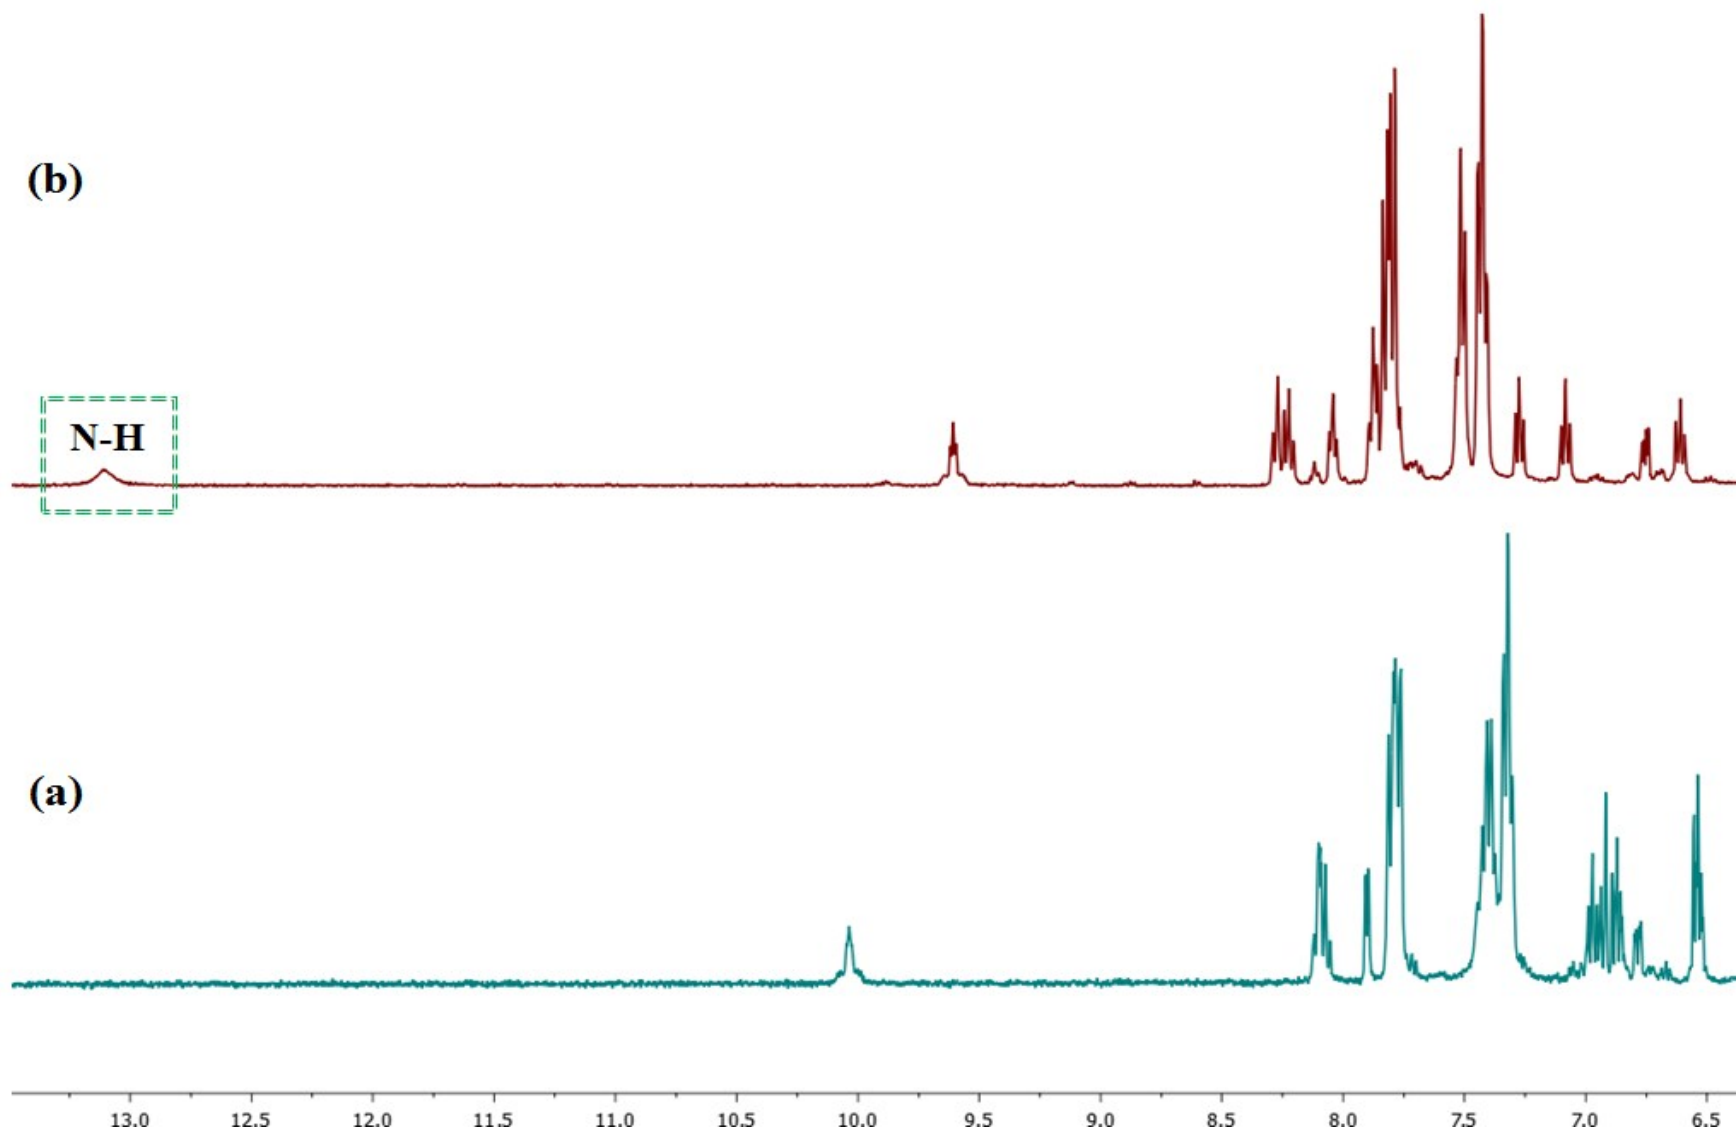

**Figure S12.** <sup>1</sup>H NMR spectra of (a) complex **2** and (b) complex **5** in acetone-*d*<sub>6</sub> at room temperature.

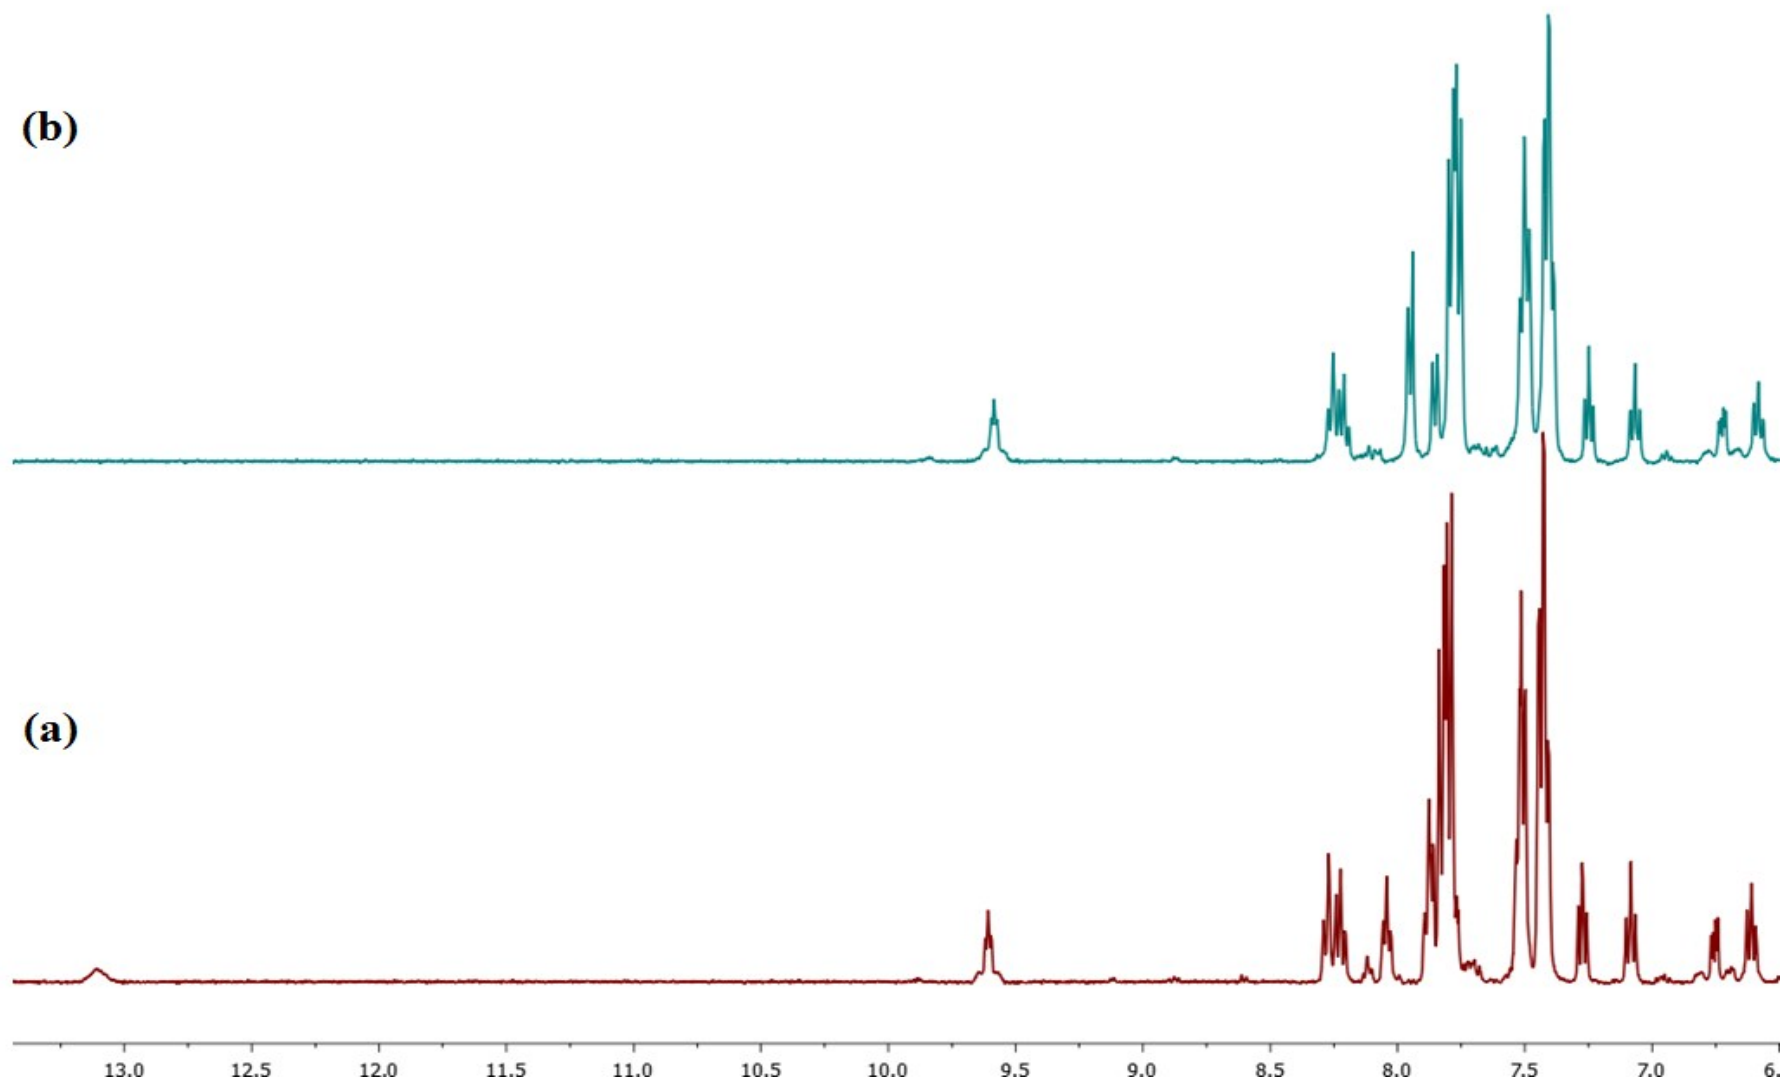

**Figure S13.** <sup>1</sup>H NMR spectra of (a) complex **5** (b) complex **5** + D<sub>2</sub>O in acetone-*d*<sub>6</sub> at room temperature.



**Table S3.** Crystallographic and structure refinement data for complex **4**.

|                                                                                                                |                                                                 |
|----------------------------------------------------------------------------------------------------------------|-----------------------------------------------------------------|
| Formula                                                                                                        | C <sub>35</sub> H <sub>28</sub> NPtS                            |
| Formula weight                                                                                                 | 720.69                                                          |
| T (K)                                                                                                          | 298(2)                                                          |
| $\lambda$ (Å)                                                                                                  | 0.71073                                                         |
| Crystal system                                                                                                 | Monoclinic                                                      |
| Space Group                                                                                                    | <i>P2</i> <sub>1</sub> / <i>c</i>                               |
| Crystal size(mm)                                                                                               | 0.25×0.15×0.12                                                  |
| <i>a</i> (Å)                                                                                                   | 17.452(4)                                                       |
| <i>b</i> (Å)                                                                                                   | 8.2580(17)                                                      |
| <i>c</i> (Å)                                                                                                   | 20.121(4)                                                       |
| $\alpha$ (°)                                                                                                   | 90                                                              |
| $\beta$ (°)                                                                                                    | 90.95(3)                                                        |
| $\gamma$ (°)                                                                                                   | 90                                                              |
| <i>V</i> (Å <sup>3</sup> )                                                                                     | 2899.4(10)                                                      |
| <i>Z</i>                                                                                                       | 4                                                               |
| <i>D</i> <sub>calc</sub> (g cm <sup>-3</sup> )                                                                 | 1.651                                                           |
| $\theta_{\min}$ , $\theta_{\max}$ (°)                                                                          | 2.32-25.00                                                      |
| <i>F</i> <sub>000</sub>                                                                                        | 1416                                                            |
| $\mu$ (mm <sup>-1</sup> )                                                                                      | 4.992                                                           |
| Index ranges                                                                                                   | -20 ≤ <i>h</i> ≤ 20<br>-9 ≤ <i>k</i> ≤ 9<br>-23 ≤ <i>l</i> ≤ 23 |
| Data collected                                                                                                 | 15434                                                           |
| Unique data                                                                                                    | 5090                                                            |
| <i>R</i> <sub>1</sub> <sup>a</sup> , <i>wR</i> <sub>2</sub> <sup>b</sup> ( <i>I</i> > 2 $\sigma$ ( <i>I</i> )) | 0.0542, 0.1014                                                  |
| <i>R</i> <sub>1</sub> <sup>a</sup> , <i>wR</i> <sub>2</sub> <sup>b</sup> (all data)                            | 0.1170, 0.1142                                                  |
| GOF on <i>F</i> <sup>2</sup> ( <i>S</i> )                                                                      | 0.803                                                           |

$$^a R_1 = \frac{\sum ||F_o| - |F_c||}{\sum |F_o|}, \quad ^b wR_2 = \left[ \frac{\sum (w(F_o^2 - F_c^2)^2)}{\sum w(F_o^2)^2} \right]^{1/2}$$

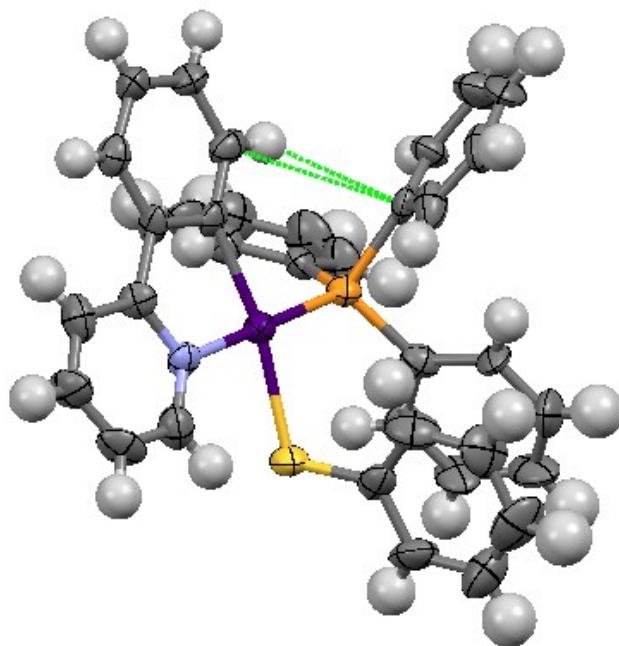

**Figure S14.** C–H $\cdots\pi$  interaction between C–H group adjacent to metalated carbon atom of the ppy ligand and the phenyl ring of PPh<sub>3</sub> ligand in complex **4** (green lines).

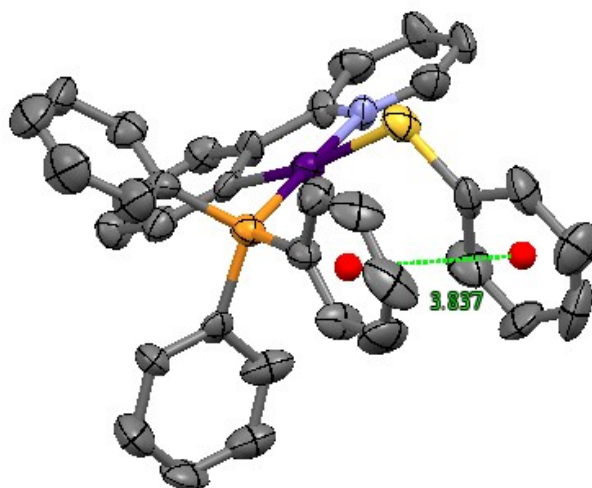

**Figure S15.** Intramolecular  $\pi\cdots\pi$  contact between the SPh and phenyl ring of PPh<sub>3</sub> in complex **4**.
